# Supplementary material
Source: PubMed Central journal article supplement (PMC2673100)

performed in triplicate. \*: statistically significant difference from mock control at  $p < 0.05$ . Statistical significance is shown with p-value for compared groups indicated by dotted line.

### Figure Legends for Supplemental data

**Suppl. Fig.1 (A)** Protein levels for Akt1, total Akt, and p-Akt(ser473) after transfection with mock or akt1 siRNA at 72 hr post-transfection are shown. **(B)** Protein levels for Erk1 and Erk2 after transfection with mock, erk1, erk2, or erk1/2 siRNA at 72 hr post-transfection are shown. **(C)** Protein levels for Erk1, Erk2, and Akt1 after transfection with mock, or erk1/2 + akt1 siRNA at 72 hr post-transfection are shown.  $\alpha$ -tubulin or  $\beta$ -actin is served as loading control.

**Suppl. Fig.2 (A)** Cell proliferation assay (CellTiter 96<sup>®</sup> AQueous One Solution, Promega) was carried out for HLFs at 24 hr post-transfection with mock or c/a Akt1 plasmid incubated with 0, 1, 2, and 3  $\mu\text{M}$   $\text{Na}_2\text{CrO}_4$  for (i) 24 hr or (ii) 48 hr. \*: statistically significant difference from mock control at  $p < 0.05$ . **(B)** HLFs were transfected with mock or c/a Akt1 plasmid via nucleofection. HLFs at 48 hr post-transfection were incubated with 0, 1, and 2  $\mu\text{M}$   $\text{Na}_2\text{CrO}_4$  for 24 hr, then seeded for colony formation. Data are expressed as percent clonogenic survival of control in the absence of Cr(VI), and are the average  $\pm$  SE from 2 experiments performed in triplicate.

**Suppl. Fig.3 (A)** Protein levels for total Mek1, HA-tag, and  $\alpha$ -tubulin after transfection with mock or c/a Mek1 plasmid at 1, 2, 3, 4, and 5 days post-transfection are shown. **(B)** Protein levels for p-Akt(ser473), HA-tag, and  $\beta$ -actin after transfection with mock or c/a Akt1 plasmid at 1, 2, 3, 4, and 5 days post-transfection are shown.

Supplemental Fig. 1

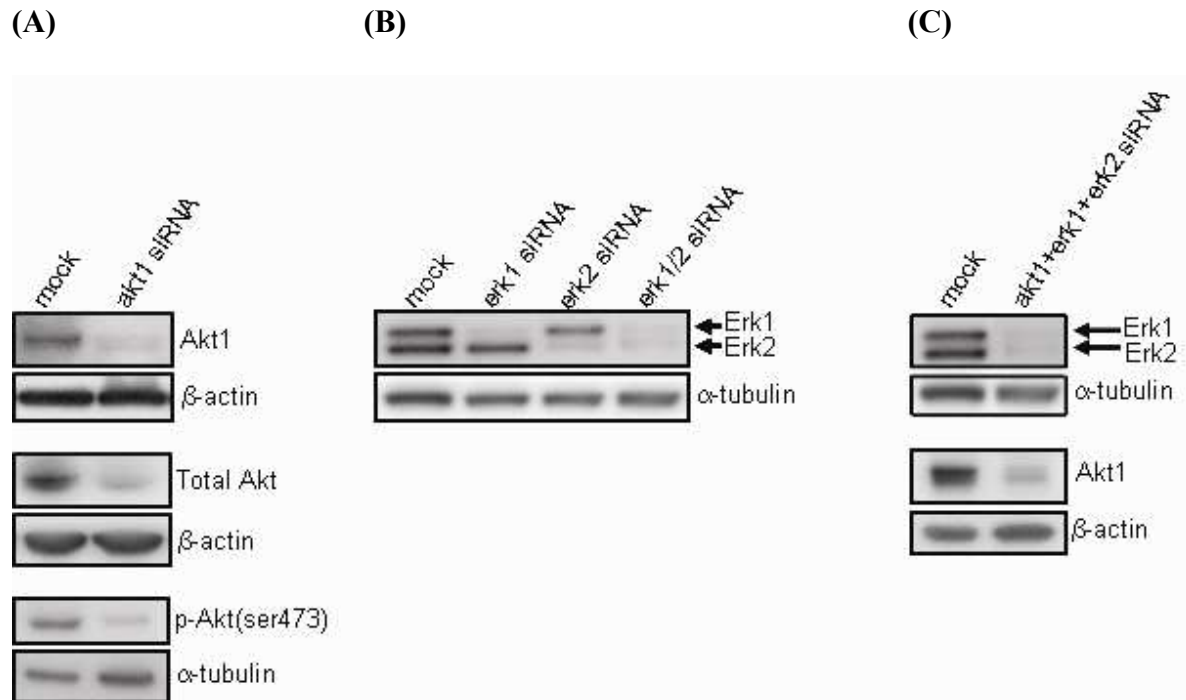

Supplemental Fig. 2

(A)

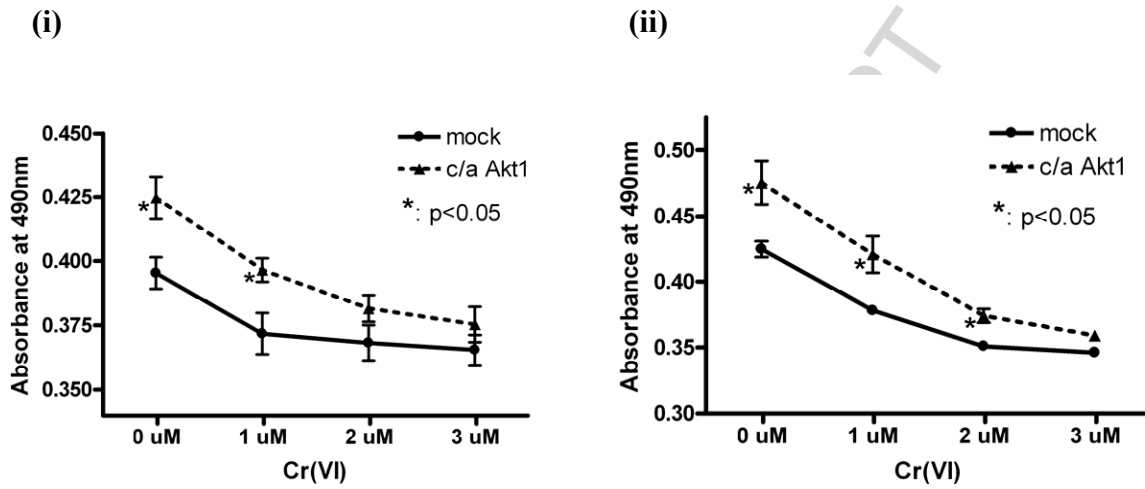

(B)

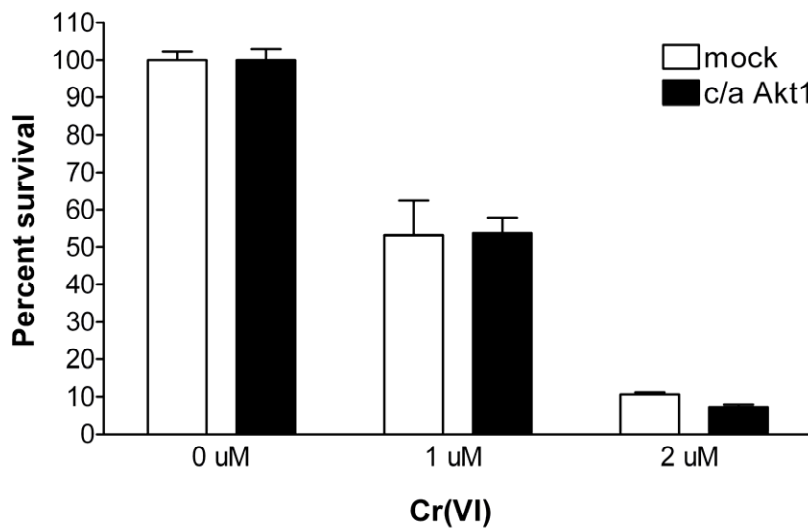

Supplemental Fig. 3

(A)

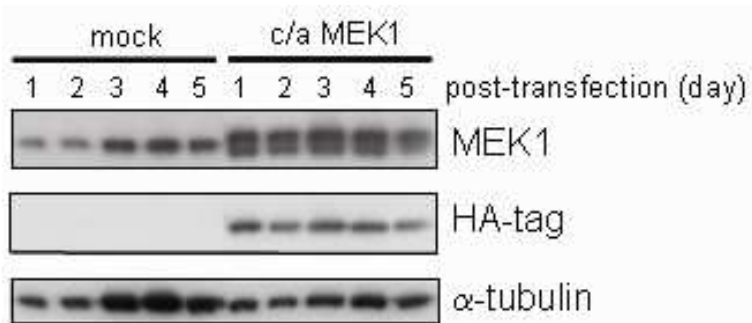

(B)

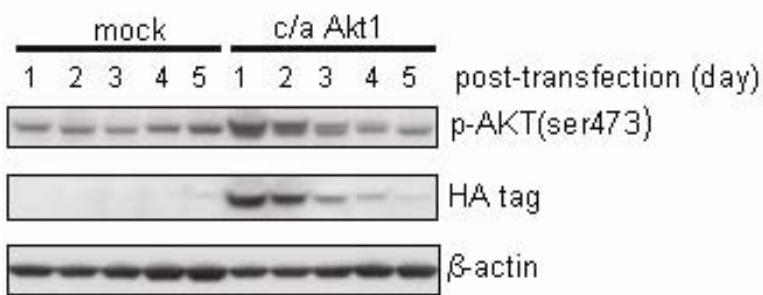

Supplement: NIHMS102765-supplement-supplement_1.pdf [file NIHMS102765-supplement-supplement_1.pdf]
